# Supplementary material for: Porous SnO2 nanostructure with a high specific surface area for improved electrochemical performance
Source: Royal Society of Chemistry journal article supplement (doi:10.1039/d0ra00531b), 2020-01-01
Supplement: d0ra00531b1.pdf [file d0ra00531b1.pdf]

## [Supporting Information]

### **Porous SnO<sub>2</sub> nanosturcutre with a high specific surface area for improved electrochemical performance**

*Hyeona Kim<sup>1</sup>, Min-Cheol Kim<sup>1</sup>, Sung-Beom Kim<sup>1</sup>, Yo-Seob Kim<sup>1</sup>, Jin-Hyeok Choi<sup>1</sup>, Kyung-  
Won Park<sup>1,\*</sup>*

<sup>1</sup> Department of Chemical Engineering, Soongsil University, Seoul 06987, Republic of Korea

\* Corresponding author. Tel: +82-2-820-0613. Fax: +82-2-812-5378.

E-mail address: kwpark@ssu.ac.kr (Prof. K.-W. Park).

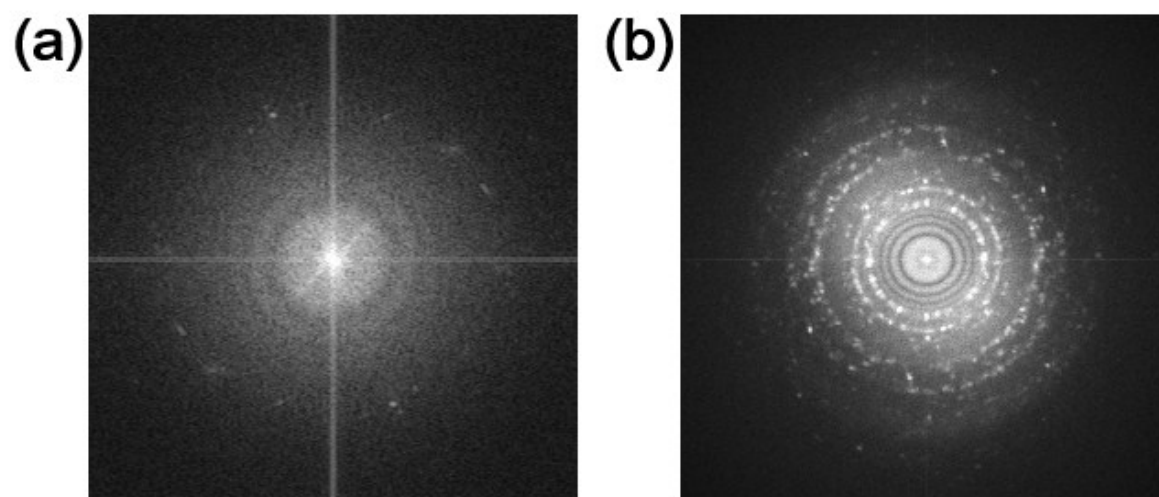

**Figure S1.** SAED pattern of (a) c-SnO<sub>2</sub> and (b) n-SnO<sub>2</sub>

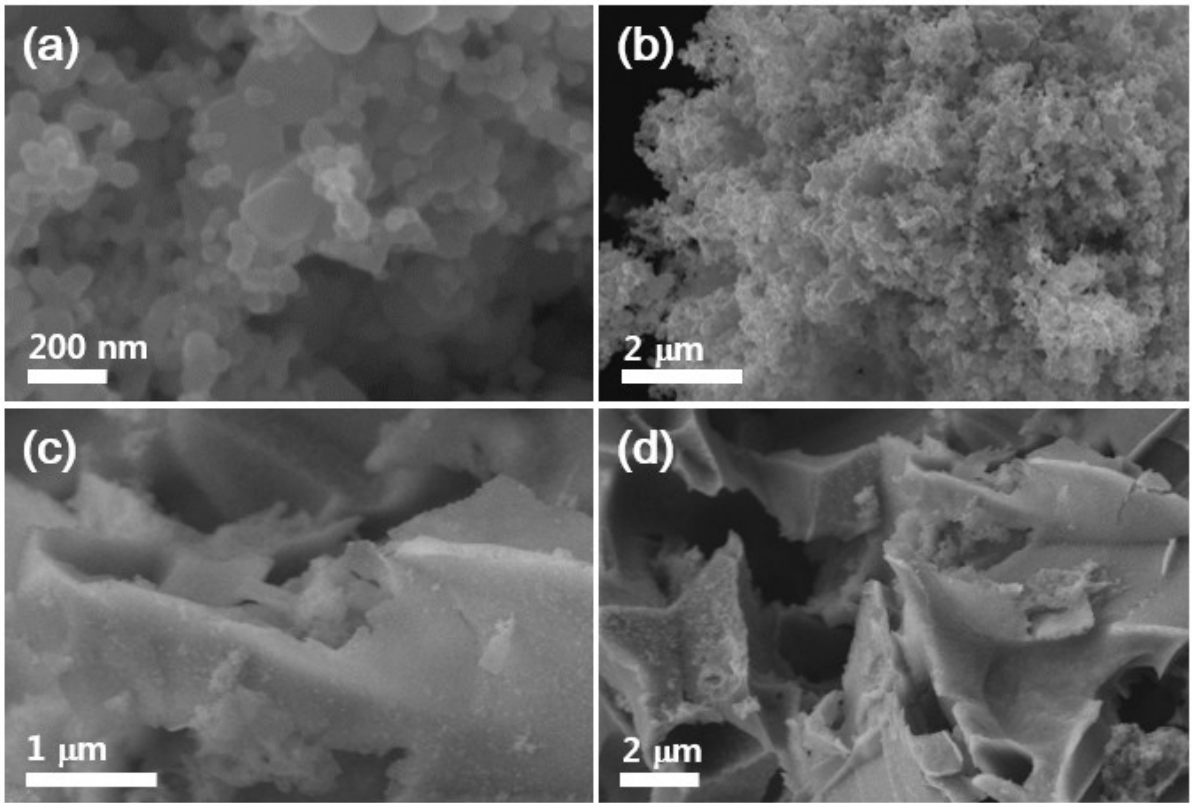

**Figure S2.** SEM images of (a), (b) c-SnO<sub>2</sub>, and (c), (d) n-SnO<sub>2</sub>.
